# Supplementary material
Source: PubMed Central journal article supplement (PMC6054330)
Supplement: ASN.2018010008SupplementaryData1.pdf [file ASN.2018010008SupplementaryData1.pdf]

## Supplemental material

- **Table S1.** Scoring criteria for Mediterranean diet and daily intake of diet's food components
- **Table S2.** Scoring criteria for DASH diet and daily intake of diet's food components
- **Tables S3.** Mean (standard deviation) values of Mediterranean and DASH diet scores by country
- **Tables S4.** Causes of death
- **Table S5.** Mean (standard deviation) daily intake of Mediterranean diet food components and associated mortality hazard ratios (95% confidence interval) for chosen increment
- **Table S6.** Mortality hazard ratio (95% confidence interval) for each serving per day increase in DASH diet food components
- **Table S7.** Association between tertiles of DASH diet score and all-cause mortality stratified by age

**Table S1. Scoring criteria for Mediterranean diet and daily intake of diet's food components**

| Food (g/d)          | Score of 1*                  | Women             | Men               |
|---------------------|------------------------------|-------------------|-------------------|
|                     |                              | Median (IQR), g/d | Median (IQR), g/d |
| Cereals             | At or above the median       | 182 (110-263)     | 197 (119-289)     |
| Fruit and nuts      |                              | 272 (143-480)     | 276 (146-473)     |
| Vegetables          |                              | 270 (162-429)     | 243 (138-403)     |
| Legumes             |                              | 23 (10-42)        | 26 (13-51)        |
| Fish                |                              | 24 (9-53)         | 26 (9-66)         |
| MUFA+PUFA/SFA       |                              | 1.6 (1.3-2.1)     | 1.6 (1.3-2.0)     |
| Dairy               | Below the median             | 143 (46-256)      | 154 (51-262)      |
| Meat                |                              | 124 (69-203)      | 139 (84-218)      |
| Alcohol             | Moderate intake <sup>†</sup> | 0 (0-0.8)         | 0 (0-5)           |
| Overall score range | 0-9                          |                   |                   |

\*Otherwise score of 0; cut-off medians are sex-specific. <sup>†</sup>From 10 to 50 grams per day for men; from 5 to 25 grams per day for women. IQR: interquartile range; MUFA: monounsaturated fatty acids; PUFA: polyunsaturated fatty acids; SFA: saturated fatty acid

**Table S2. Scoring criteria for DASH diet and daily intake of diet's food components**

| Food (servings/d)*      | Scoring criteria†      | Women |        | Men  |        |
|-------------------------|------------------------|-------|--------|------|--------|
|                         |                        | Q1    | Q5     | Q1   | Q5     |
| Fruits                  | Q1 = 1 point           | 1.1   | 5.3    | 1.2  | 5.0    |
| Vegetables              | Q2 = 2 points          | 2.1   | 6.6    | 1.8  | 6.4    |
| Nuts and legumes        | Q3 = 3 points          | 0.1   | 0.6    | 0.1  | 0.8    |
| Low-fat dairy           | Q4 = 4 points          | 0.1   | 1.5    | 0.1  | 1.4    |
| Whole grains            | Q5 = 5 points          |       |        |      |        |
|                         | Consumers = 1 point    |       |        |      |        |
|                         | No consumers = 0 point |       |        |      |        |
| Sodium (mg/d)           | Q1 = 5 points          | 794   | 1937   | 834  | 2110   |
|                         | Q2 = 4 points          |       |        |      |        |
|                         | Q3 = 3 points          |       |        |      |        |
| Red and processed meats | Q4 = 2 points          | 0.4   | 2.0    | 0.6  | 2.3    |
|                         | Q5 = 1 point           |       |        |      |        |
| Sweetened beverages     | T1 = 3 points          | T1=0  | T3=0.1 | T1=0 | T3=0.2 |
|                         | T2 = 2 points          |       |        |      |        |
|                         | T3 = 1 point           |       |        |      |        |
| Overall score range     | 7-34                   |       |        |      |        |

\*Except for sodium (mg/d). †Using sex specific cut-off. Q= quintiles; T=tertiles

**Table S3. Mean (standard deviation) values of Mediterranean and DASH diet scores by country**

| <b>Country</b> | <b>Mediterranean diet score<br/>(scale 0 to 9)</b> | <b>DASH diet score<br/>(scale 7 to 34)</b> |
|----------------|----------------------------------------------------|--------------------------------------------|
| Argentina      | 3.4 (1.4)                                          | 18.3 (3.4)                                 |
| France         | 4.4 (1.6)                                          | 20.8 (3.2)                                 |
| Germany        | 3.0 (1.5)                                          | 18.7 (3.8)                                 |
| Hungary        | 3.7 (1.5)                                          | 19.9 (3.5)                                 |
| Italy          | 5.3 (1.5)                                          | 22.1 (3.3)                                 |
| Poland         | 3.1 (1.4)                                          | 18.4 (3.7)                                 |
| Portugal       | 4.6 (1.6)                                          | 20.6 (3.5)                                 |
| Romania        | 4.1 (1.5)                                          | 20.4 (3.4)                                 |
| Spain          | 4.3 (1.4)                                          | 20.9 (3.5)                                 |
| Sweden         | 3.5 (1.5)                                          | 18.2 (3.4)                                 |
| Turkey         | 4.2 (1.3)                                          | 23.1 (3.2)                                 |
| <b>Overall</b> | 4.1 (1.6)                                          | 20.5 (3.7)                                 |

**Tables S4. Causes of death**

| <b>Cause of death</b>    | <b>Overall (N=2087)<br/>n (%)</b> |
|--------------------------|-----------------------------------|
| Cardiovascular           | 829 (39.7)                        |
| Infection                | 361 (17.3)                        |
| Cancer                   | 158 (7.6)                         |
| Cerebrovascular          | 129 (6.2)                         |
| Gastrointestinal         | 72 (3.5)                          |
| Liver disease            | 24 (1.1)                          |
| Withdrawal from dialysis | 24 (1.1)                          |
| Metabolic                | 7 (0.3)                           |
| Endocrine                | -                                 |
| Other/Unknown            | 483 (23.1)                        |

**Table S5. Mean (standard deviation) daily intake of Mediterranean diet food components and associated mortality hazard ratios (95% confidence interval) for chosen increment**

| Diet food component (g/d) | Mean (SD) |           | Increment* | Adjusted hazard ratio (95% CI) <sup>†</sup> |                     |
|---------------------------|-----------|-----------|------------|---------------------------------------------|---------------------|
|                           | Women     | Men       |            | Cardiovascular mortality                    | All-cause mortality |
| Cereals                   | 204 (145) | 224 (161) | 150        | 1.07 (0.99-1.16)                            | 1.04 (0.99-1.09)    |
| Fruit and nuts            | 378 (384) | 370 (359) | 370        | 0.96 (0.87-1.05)                            | 0.94 (0.89-1.00)    |
| Vegetables                | 335 (288) | 309 (263) | 270        | 1.04 (0.95-1.14)                            | 0.96 (0.91-1.02)    |
| Legumes                   | 37 (58)   | 43 (62)   | 60         | 1.02 (0.94-1.11)                            | 1.00 (0.95-1.05)    |
| Fish                      | 41 (58)   | 47 (58)   | 58         | 1.05 (0.95-1.16)                            | 1.05 (0.99-1.11)    |
| MUFA+PUFA/SFA             | 1.8 (0.7) | 1.7 (0.7) | 0.7        | 0.99 (0.91-1.07)                            | 0.98 (0.94-1.03)    |
| Dairy                     | 189 (200) | 196 (208) | 200        | <b>1.10 (1.03-1.17)</b>                     | 1.03 (0.98-1.07)    |
| Meat                      | 157 (138) | 173 (141) | 140        | 0.92 (0.83-1.02)                            | 0.99 (0.93-1.05)    |
| Alcohol                   | 1.5 (4.7) | 4.5 (8.9) | 7          | 1.01 (0.93-1.09)                            | 0.98 (0.93-1.02)    |

\*Arbitrary chosen number around average of within sex standard deviation. <sup>†</sup>For cardiovascular mortality adjusted for country (random effect), gender, daily physical activity, education (secondary versus none/primary), diabetes, smoking (current or former versus never), myocardial infarction, vascular access type (fistula versus graft/catheter), body mass index (categories according to World Health Organization), albumin (tertiles), Charlson comorbidity score (quartiles), age, phosphorus, calcium, hemoglobin, Kt/V, and energy intake (1000 kcal day increase). For all-cause mortality adjusted as above plus having a life partner, time on dialysis and being wait-listed for transplantation. MUFA: monounsaturated fatty acids; PUFA: polyunsaturated fatty acids; SFA: saturated fatty acid

**Table S6. Mortality hazard ratio (95% confidence interval) for each serving per day increase in DASH diet food components**

| Diet food component    | Adjusted hazard ratio (95% CI)* |                     |
|------------------------|---------------------------------|---------------------|
|                        | Cardiovascular mortality        | All-cause mortality |
| Fruits                 | 0.99 (0.97-1.02)                | 0.99 (0.97-1.00)    |
| Vegetables             | 1.00 (0.97-1.03)                | 0.98 (0.97-1.00)    |
| Nuts and legumes       | 1.00 (0.88-1.14)                | 1.00 (0.93-1.08)    |
| Low-fat dairy          | <b>1.09 (1.02-1.17)</b>         | 1.04 (0.99-1.08)    |
| Whole grains           | 0.92 (0.83-1.02)                | 0.98 (0.92-1.04)    |
| Sodium <sup>†</sup>    | 0.93 (0.72-1.20)                | 0.96 (0.82-1.12)    |
| Red and processed meat | 0.98 (0.91-1.05)                | 0.99 (0.95-1.04)    |
| Sweetened beverages    | 0.90 (0.80-1.01)                | 1.01 (0.96-1.08)    |

\*For cardiovascular mortality adjusted for country (random effect), gender, daily physical activity, education (secondary versus none/primary), diabetes, smoking (current or former versus never), myocardial infarction, vascular access type (fistula versus graft/catheter), body mass index (categories according to World Health Organization), albumin (tertiles), Charlson comorbidity score (quartiles), age, phosphorus, calcium, hemoglobin, Kt/V, and energy intake (1000 kcal day increase). For all-cause mortality adjusted as above plus having a life partner, time on dialysis and being wait-listed for transplantation. <sup>†</sup>Per 1000 mg increase in sodium intake

**Table S7. Association between tertiles of DASH diet score and all-cause mortality stratified by age**

| Model*                       | Age (years) | DASH diet score |                  |                         | p-value for interaction |
|------------------------------|-------------|-----------------|------------------|-------------------------|-------------------------|
|                              |             | 8 to 19         | 20 to 22         | ≥23                     |                         |
| Random effect                | ≤60         | reference       | 1.02 (0.81-1.29) | <b>0.70 (0.53-0.94)</b> | <b>0.03</b>             |
|                              | >60         | reference       | 1.05 (0.93-1.19) | 1.08 (0.95-1.23)        |                         |
| Fixed effect, competing risk | ≤60         | reference       | 1.02 (0.81-1.29) | <b>0.72 (0.53-0.97)</b> | <b>0.03</b>             |
|                              | >60         | reference       | 1.04 (0.92-1.18) | 1.07 (0.94-1.22)        |                         |
| Case-complete, random effect | ≤60         | reference       | 1.00 (0.68-1.48) | <b>0.43 (0.26-0.76)</b> | <b>&lt;0.001</b>        |
|                              | >60         | reference       | 1.16 (0.97-1.39) | 1.05 (0.87-1.26)        |                         |

\* Adjusted for country (random effect or fixed effect), gender, daily physical activity, education (secondary versus none/primary), life partner, being wait-listed for transplantation, diabetes, smoking (current or former versus never), myocardial infarction, vascular access type (fistula versus graft/catheter), body mass index (categories according to World Health Organization), albumin (tertiles), Charlson comorbidity score (quartiles), age, phosphorus, calcium, hemoglobin, time on dialysis, Kt/V and energy intake (1000 kcal day increase)
